# Supplementary material
Source: Research Square preprint supplement (doi:10.21203/rs.3.rs-9666273/v1)
Supplement: Supplementary file 1 [file 9d9b5a8f41e9dd30451ee344.docx]

**Quantitative correlation between DNSH Criteria and LCA Indicators: methodological proposal and case studies validation in the wastewater sector– Supplementary Material**

Lorenzo Tombolinia,b,*, Elisa Blumenthalb, Massimiliano Sgroib, Anna Laura Eusebib*, Francesco Fatoneb

*aDepartment of industrial engineering-DII, University of Padua, Via 8 Febbraio, 2 - 35122 Padova, Italy*

*b Department of Science and Engineering of Materials, Environment and Urban Planning-SIMAU, Marche Polytechnic University, Via Brecce Bianche 12, 60131 Ancona, Italy.*

*Corresponding authors: Anna Laura Eusebi and Lorenzo Tombolini

E-mail: [lorenzo.tombolini@phd.unipd.it](mailto:lorenzo.tombolini@phd.unipd.it), e.blumenthal@pm.univpm.it, m.sgroi@univpm.it, [a.l.eusebi@univpm.it](mailto:a.l.eusebi@univpm.it), f.fatone@univpm.it

S1 - LCIA for the realization phase of WWTP1

S2 - Normalized LCIA for the realization phase of WWTP1

S4 – Normalized LCIA for the realization of WWTP2

S3 - LCIA for the realization of WWTP2

S5 - Environmental payback period WWTP1

S6 - Environmental payback period WWTP2
